# Supplementary material for: Chemical vapor deposition of tin sulfide from diorganotin(IV) dixanthates
Source: Springer Nature journal article supplement (doi:10.1007/s10853-018-2968-y), 2018-09-28
Supplement: MOESM1 [file 16161660]

**Chemical Vapor Deposition of Tin Sulfide from Diorganotin(IV) Dixanthates**

**- Supplementary Information**

Mundher Al-Shakban,1 Peter D. Matthews,3 Edward A. Lewis,1 James Raftery,2 Inigo Vitorica-Yrezabal,2 Sarah J. Haigh,1 David J. Lewis1 and Paul O’Brien1,2,*

1 School of Materials, University of Manchester, Oxford Road, Manchester M13 9PL, UK

2 School of Chemistry, University of Manchester, Oxford Road, Manchester M13 9PL, UK

3 School of Chemical & Physical Sciences, Keele University, Newcastle-under-Lyme, Staffordshire, ST5 5BG, UK.

*Tel: (+44)161 2754652; E-mail: [p.d.matthews@keele.ac.uk](mailto:p.d.matthews@keele.ac.uk), paul.obrien@manchester.ac.uk

1. **Crystallography**

**
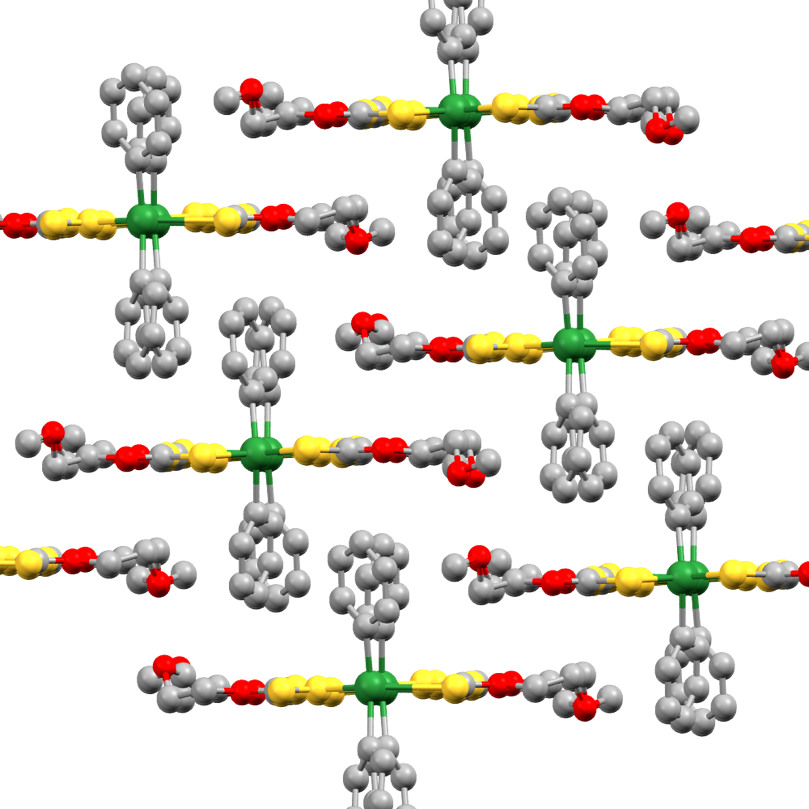
**

**Figure S1.1.** Packing of **1**. Image looking down the a axis. H are omitted for clarity. Green = Sn, yellow = S, red = O, grey = C

**
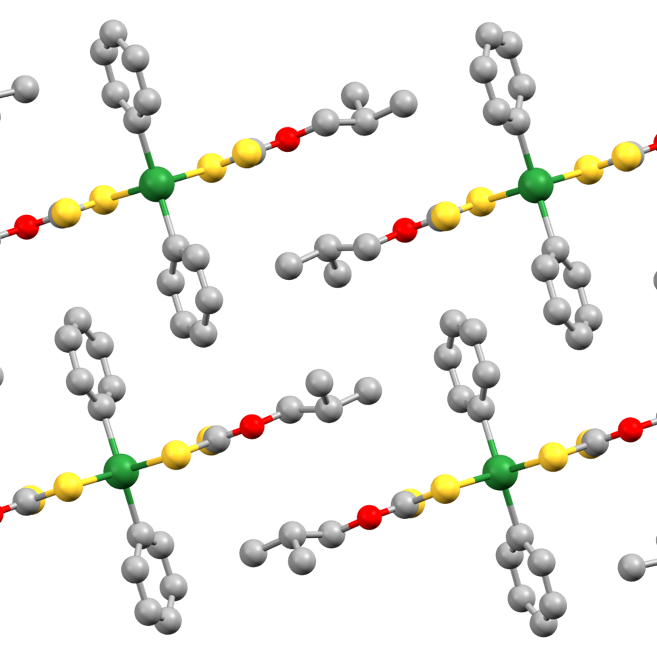
**

**Figure S1.2.** Packing of **2**. Image looking down the b axis. H are omitted for clarity. Green = Sn, yellow = S, red = O, grey = C.

**Data Collection**.

Single crystal X-ray diffraction data was collected for the crystal structure **1** at a temperature of 100 K using Cu-Kα radiation on a Bruker X8 Prospector, equipped with an APEX CCD detector and an Oxford Cryostream nitrogen flow gas system. Data was measured using APEX 2 suite of programs. Single crystal X-ray diffraction data was collected for the crystal structure **2** at a temperature of 150 K using Mo-Kα radiation on a Rigaku FR-X rotating anode, equipped with a HyPix6000HE detector and an Oxford Cryostream nitrogen flow gas system. Data was measured using CrisALisPro suite of programs.

**Crystal structure determinations and refinements.**

X-ray data was processed and reduced using CrysAlisPro suite of programs for crystals **1** and **2**. Absorption correction was performed using empirical methods based upon symmetry-equivalent reflections combined with measurements at different azimuthal angles using SCALE3 ABSPACK. The crystal structures were solved and refined against all F2 values using the SHELXL and Olex 2 suite of programs.[1, 2] All the atoms were refined anisotropically. Hydrogen atoms were placed in calculated positions refined using idealized geometries (riding model) and assigned fixed isotropic displacement parameters. Disordered iPr chains in compound **2** were modelled over two positions. SADI command was used to restrain the C-C distances. RIGU command was used to restrain the atomic displacement parameters.

CCDC 1567491-1567492 contains the supplementary crystallographic data for this paper. These data can be obtained free of charge via [www.ccdc.cam.ac.uk/conts/retrieving.html](http://www.ccdc.cam.ac.uk/conts/retrieving.html) (or from the Cambridge Crystallographic Data Centre, 12 Union Road, Cambridge CB21EZ, UK; fax: (+44)1223-336-033; or [deposit@ccdc.cam.ac.uk](mailto:deposit@ccdc.cam.ac.uk)).

**Table S1.1.** Crystallographic information for **1** and **2.**

| Compound | | **1** | **2** |
| --- | --- | --- | --- |
| Empirical formula | | C20 H24 O4 S4 Sn | C22 H28 O2 S4 Sn |
| Formula weight | | 575.32 | 571.37 |
| Temperature (K) | | 100 | 150 |
| Wavelength (Å ) | | 1.54178 | 0.71073 |
| Crystal system | | Triclinic | Monoclinic |
| Space group | | P -1 | I2/a |
| Unit cell dimensions | a (Å) | 12.5186(7) | 17.6280(11) |
| b (Å) | 13.3829(7) | 6.1495(3) |
| c (Å) | 14.8847(8) | 45.750(3) |
| α (°) | 74.001(3) | 90 |
| β (°) | 78.088(4) | 97.059(6 |
| γ (°) | 76.657(3) | 90 |
| Volume (Å3) | | 2305.1(2) | 4921.9(5) |
| Z | | 4 | 8 |
| Absorption coefficient mm-1 | | 12.409 | 1.394 |
| Crystal size mm3 | | 0.08 x 0.13 x 0.19 | 0.09 x 0.1 x 0.2 |
| Reflections collected | | 47915 | 14855 |
| Independent reflections | | 8520 [R(int) = 0.0633] | 4519 [R(int) = 0.0618] |
| Goodness-of-fit on F2 | | 1.025 | 1.094 |
| Final R indices [I>2σ(I)] | | R1 = 0.0370, wR2 = 0.0821 | R1 = 0.0516, wR2 = 0.0950 |
| R indices (all data) | | R1 = 0.0498, wR2 = 0.0894 | R1 = 0.0840, wR2 = 0.1037 |

1. **Thermogravimetric Analysis**

**
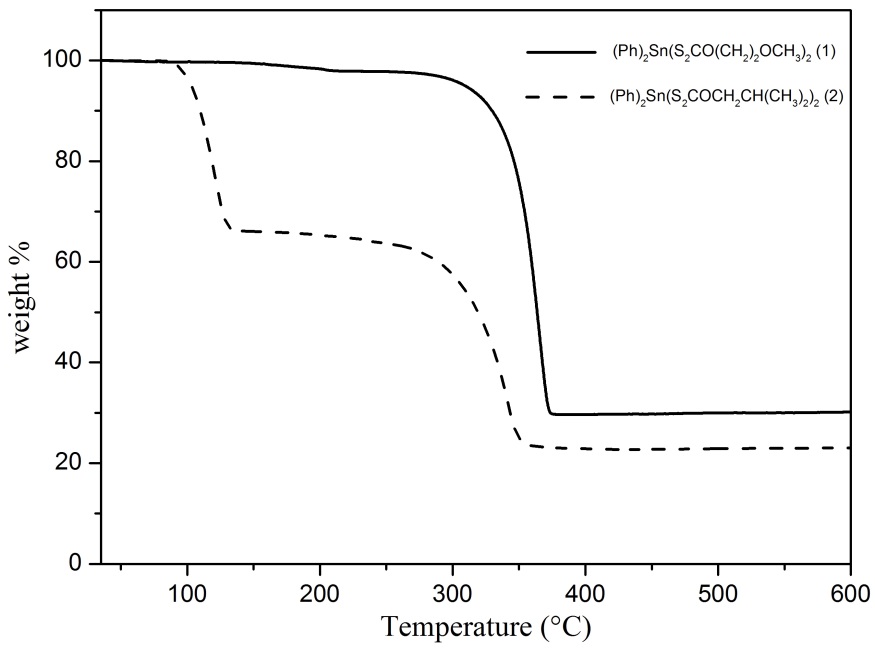
**

**Figure S2.1.** Thermogravimetric decomposition curve of **1** and **2**.

1. **Transmission Electron Microscopy**


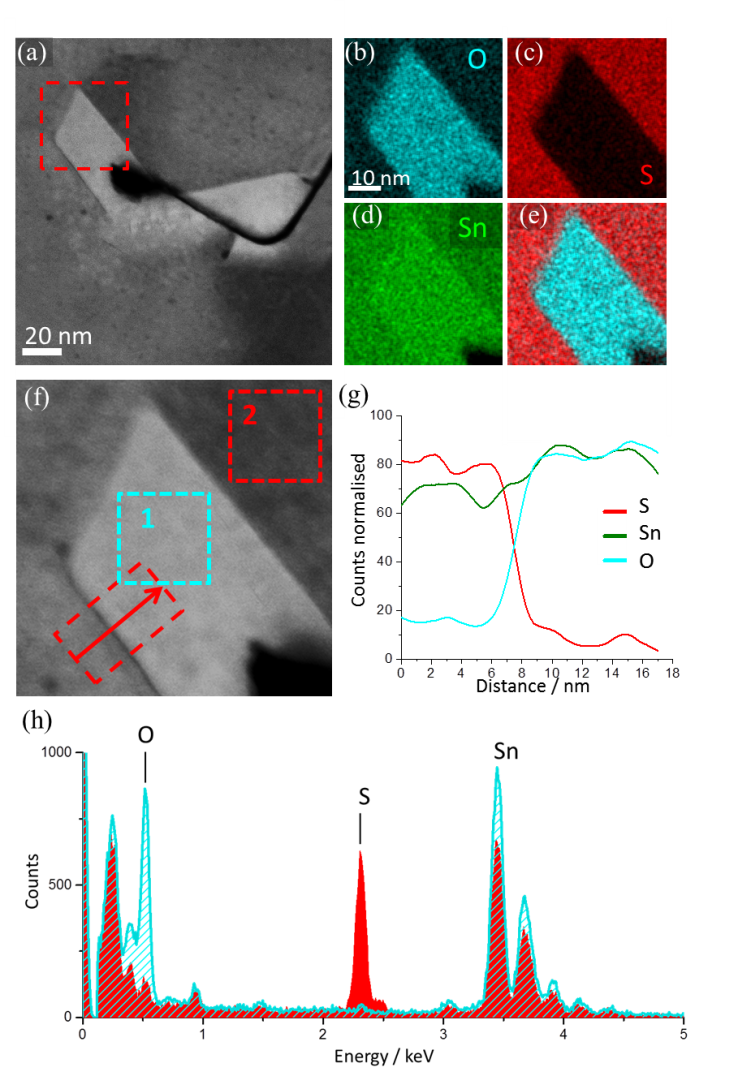


**Figure S3.1.** EDX spectrum imaging of a region of the sample prepared at 575 °C indicated by the dashed red box on the HAADF STEM image in (a). (b-e) show elemental maps extracted from the spectrum image showing the distriubition of O (cyan), S (red), and Sn (green). While Sn is found in all regions, O and S and mutually exclusive, indicating a sharp transition from SnS to SnO2. This is further illustrated by a line scan (g), the line position is shown by the red arrow in (f). Spectra extracted from two regions indicated by dashed boxes in (f) are shown in (h) showing that almost no S is detected in the oxide region.


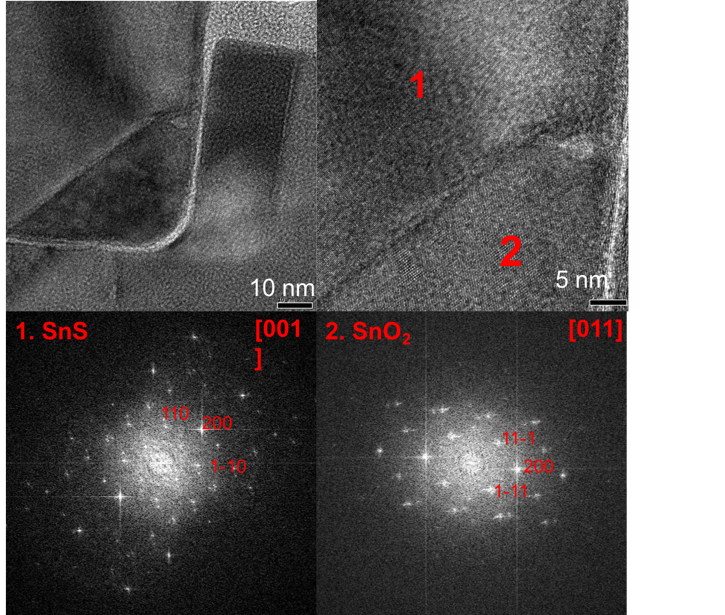


**Figure S3.2.** Atomic resolution images indicate that the SnS and SnO2 are both crystalline.

1. **SEM Images**


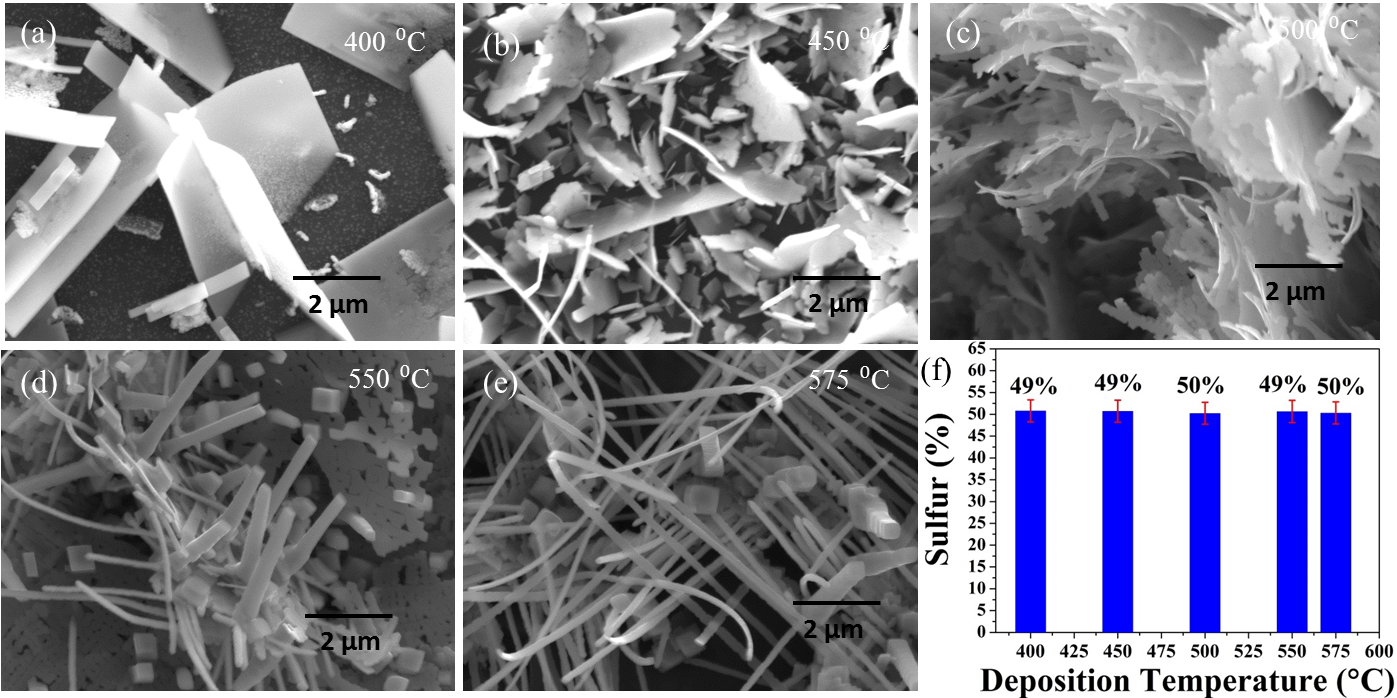


Figure S4.1 (a)-(e) Scanning electron microscopy (SEM) images of the deposited films from complex 2. (f) Sulfur content determined by energy dispersive x-ray spectroscopy (EDX).

1. **Band gap measurements**

Table S5.1 Phases, thicknesses, band gaps of the films produced by the AA.CVD method from diphenyltin bis(2-methoxyethylxanthate) [Ph2Sn(S2CO(CH2)2OMe)2] (**1**) and diphenyltin bis(*iso*-butylxanthate) [Ph2Sn(S2COiBu)2] (**2**).

| Deposition temperature(oC) | | 400 | 450 | 500 | 550 | 575 |
| --- | --- | --- | --- | --- | --- | --- |
| Complex 1 | Phase | SnS/SnO2 | SnS/SnO2 | SnS/SnO2 | SnS/SnO2 | SnS/SnO2 |
| Thickness of films(nm)* | 730 | 820 | 690 | 750 | 680 |
| Eg(eV) | 2.97 | 2.91 | 2.60 | 2.47 | 1.71 |
| Complex 2 | Phase | SnS | SnS | SnS | SnS | SnS |
| Thickness of films(nm)* | **-** | **-** | 670 | 820 | 610 |
| Eg(eV) | **-** | **-** | 1.46 | 1.41 | 1.28 |

***** average values of the thickness


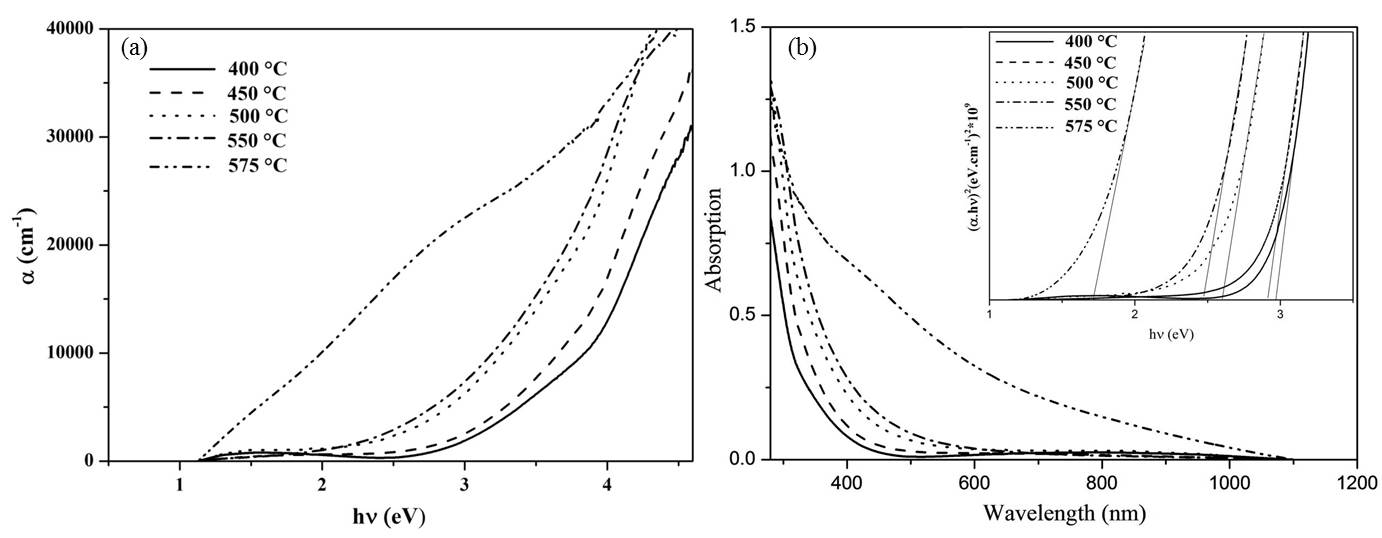


Figure S5.1 (a) Absorption coefficient (α) of films grown on glass substrates from diphenyltin bis(2-methoxyethylxanthate) [Ph2Sn(S2CO(CH2)2OMe)2] (1) deposited at temperatures between 400 and 575 °C by AA.CVD. (b) UV–Vis and Tauc plots (*inset*) for the films deposited on glass substrates from (1).


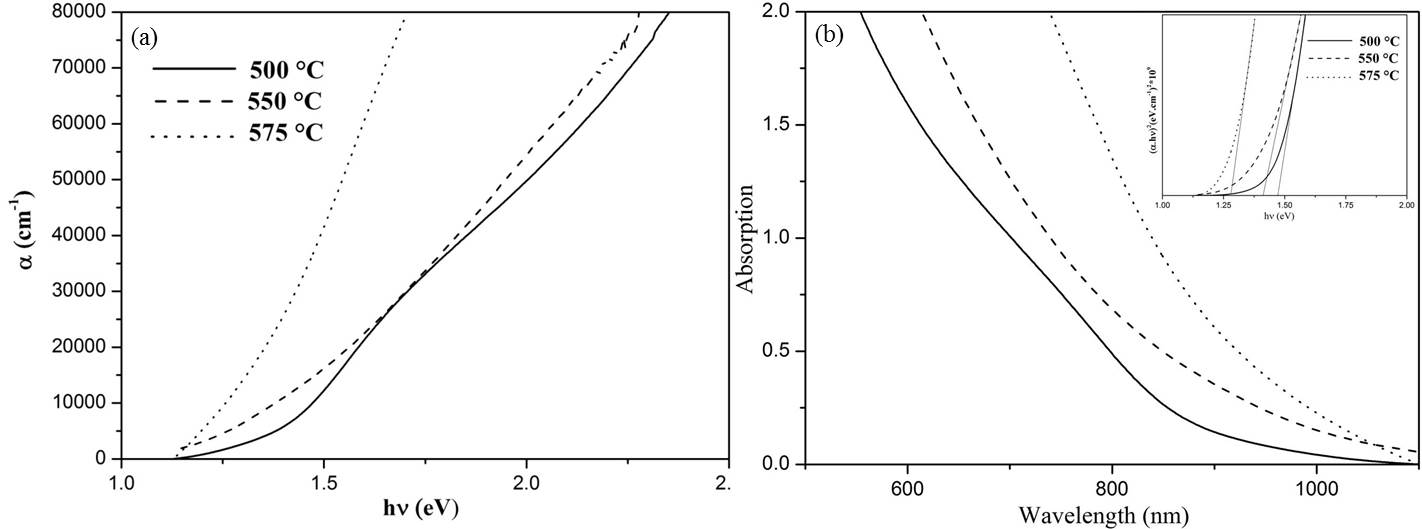


Figure S5.2 (a) Absorption coefficient (α) of SnS films grown on glass substrates from diphenyltin bis(*iso*-butylxanthate) [Ph2Sn(S2COiBu)2] (2).deposited at temperatures between 500 and 575 °C by AA.CVD. (b) UV–Vis and Tauc plots (*inset*) for the films deposited on glass substrates from (2).

1. **References**

1. Sheldrick GM (2015) SHELXT–Integrated space-group and crystal-structure determination. Acta Cryst A. 71:3-8. doi:10.1107/S2053273314026370

2. Dolomanov OV, Bourhis LJ, Gildea RJ, Howard JA, Puschmann H (2009) OLEX2: a complete structure solution, refinement and analysis program. J Appl Cryst. 42:339-341. doi.org/10.1107/S0021889808042726
